# Supplementary material for: Enhancement of Ambulatory Glucose Profile for Decision Assistance and Treatment Adjustments
Source: MDPI journal article supplement (doi:10.3390/diagnostics14040436), 2024-02-16
Supplement: s1 [file s1]

## Supplementary Material 1: Metrics and formulas

Following are the statistical formulas to evaluate the metrics:

1. Standard deviation rate of change (SDR): The rate of change of the SD is calculated as

$$SDR = \frac{[BG(T_I) - BG(T_{I-1})]}{(T_I - T_{I-1})}$$

where,

$SDR$  = Standard Deviation Rate of Change,  $BG$ = blood glucose levels,  $T_I$ =Timestamp at  $I^{\text{th}}$  blood glucose level,  $T_{I-1}$ =Timestamp at the  $(I-1)^{\text{th}}$  blood glucose level

2. Interquartile Range (IQR): The Interquartile range was calculated using the following equation:

$$IQR = \text{Third quartile}(Q3) - \text{first quartile}(Q1)$$

where,

$Q3$  =third quartile,  $Q1$ =first quartile

3. Standard deviation (SD): The SD was calculated as,

$$SD = \sqrt{\frac{\sum_{tn=tn_1}^{tn_N} (BG_{tni} - \overline{BG_{tn}})^2}{N - 1}}$$

where,

$SD$  = Standard Deviation,  $BG_{tn1}$  = individual  $BG$  observation,

$\overline{BG_{tn}}$  = Mean of  $BG$  observations

4. Mean of daily differences (MODD): A higher MODD indicated an irregular lifestyle. MODD is calculated as,

$$MODD = \frac{\sum_{tn=tn_1}^{tn_P} |BG_{tn} - BG_{tn-1440}|}{P}$$

where,

$MODD$  = Mean of daily differences,  $tn$ =timestamp,  $tn_1, tn_P$  =timestamp at 1st cgm reading and last reading,  $BG_{tn}$  =individual cgm readings,  $BG_{1440}$ = mean of cgm readings for 24 hours,  $N$ =number of cgm readings

5. Continuous Overall Net Glycemic Action (CONGA): CONGA was calculated as,

$$CONGA = \sqrt{\frac{\sum_{tn=tn_1}^{tn_P} (D_{tn} - \overline{D})^2}{P - 1}}$$

where,

CONGA = Continuous Overall Net Glycemic Action,  $D_{tn} = BG_{tn} - BG_{tn-M}$ ,  $\bar{D} = \frac{\sum_{tn=tn_1}^{tn_p} SD_{tn}}{P}$ ,  $D_{tn}$  =difference between BG taken at time t and BG taken n h earlier-,  $\bar{D}$  =average of these ( $D_{tn}$ ) differences,  $BG_{tn} - BG_{tn-M}$ , P= number of available BG observations in 24 h (1440min) apart,  $M=n \times 60$

6. Mean amplitude of glycemic excursions (MAGE): MAGE is calculated as,

$$MAGE = \frac{\sum \alpha}{Y} \text{ if } \alpha > SD$$

where,

MAGE = Mean Amplitude of Glycemic Excursions,  $\alpha$ =absolute difference between sequential glucose peaks and nadirs, Y =no. of valid observations,  $\beta$  =1 SD of the mean glucose level.

# Web Interface

1(A)

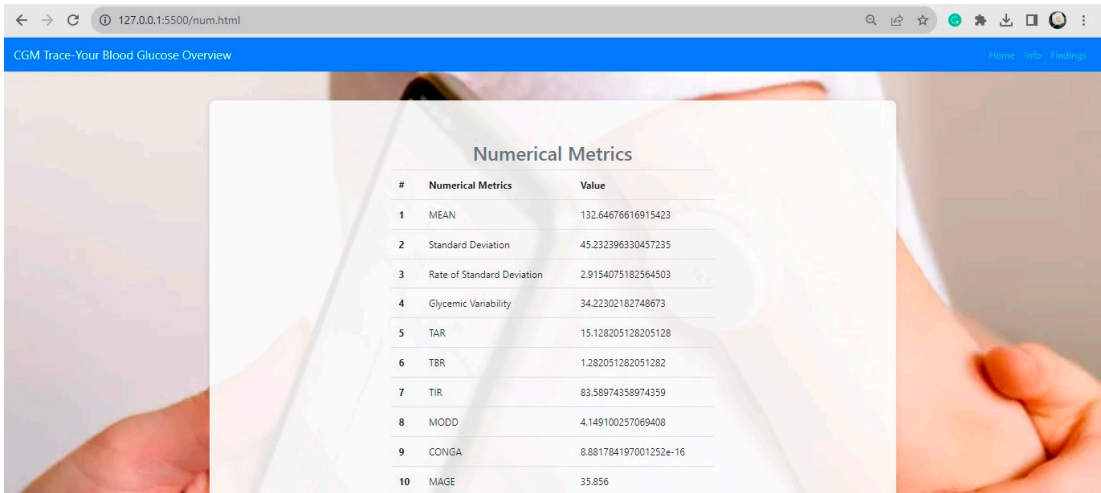

1(B)

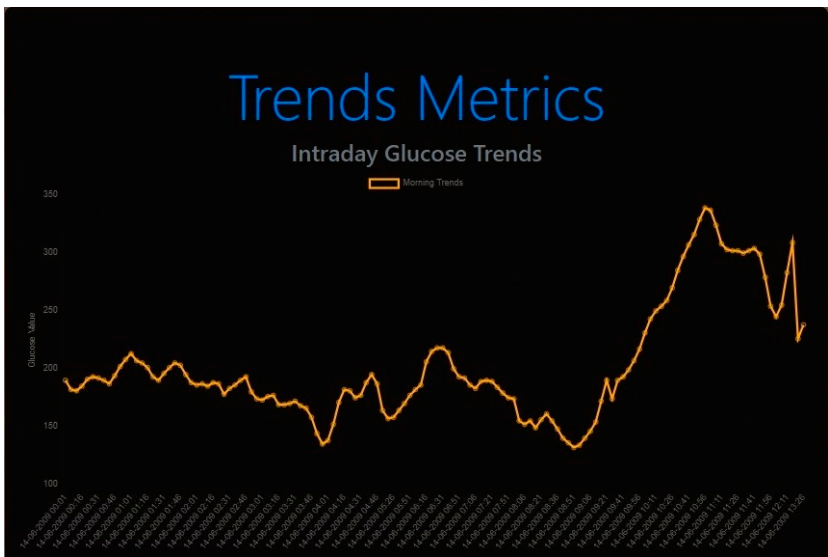

1(C)

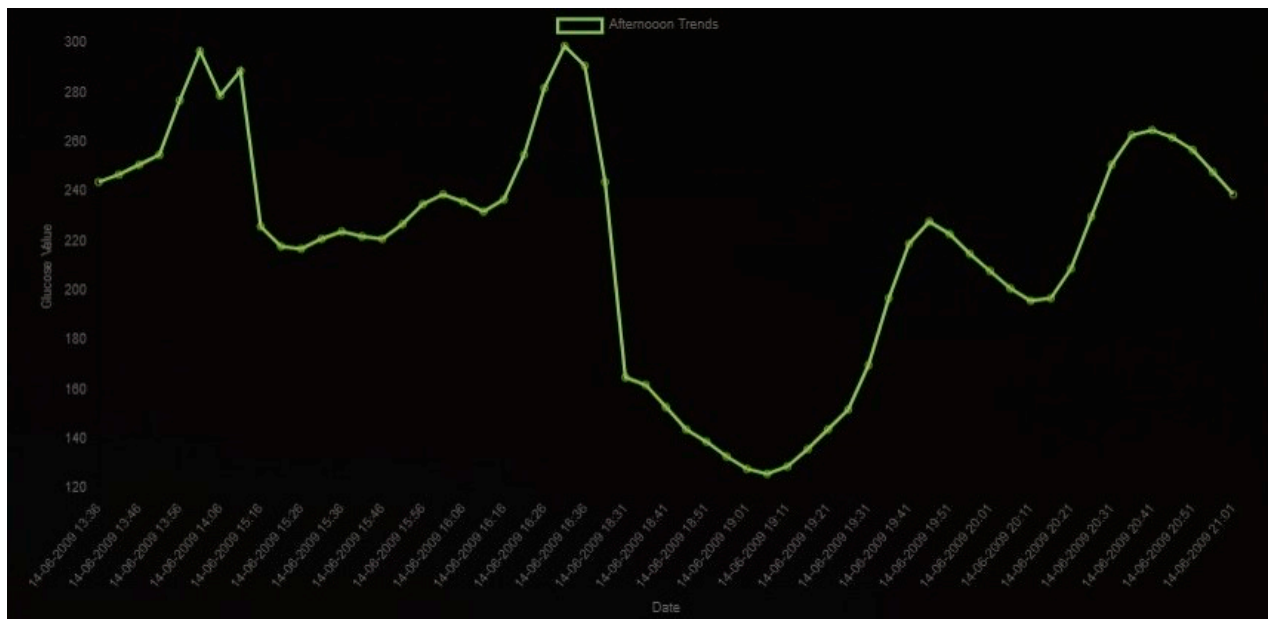

1(D)

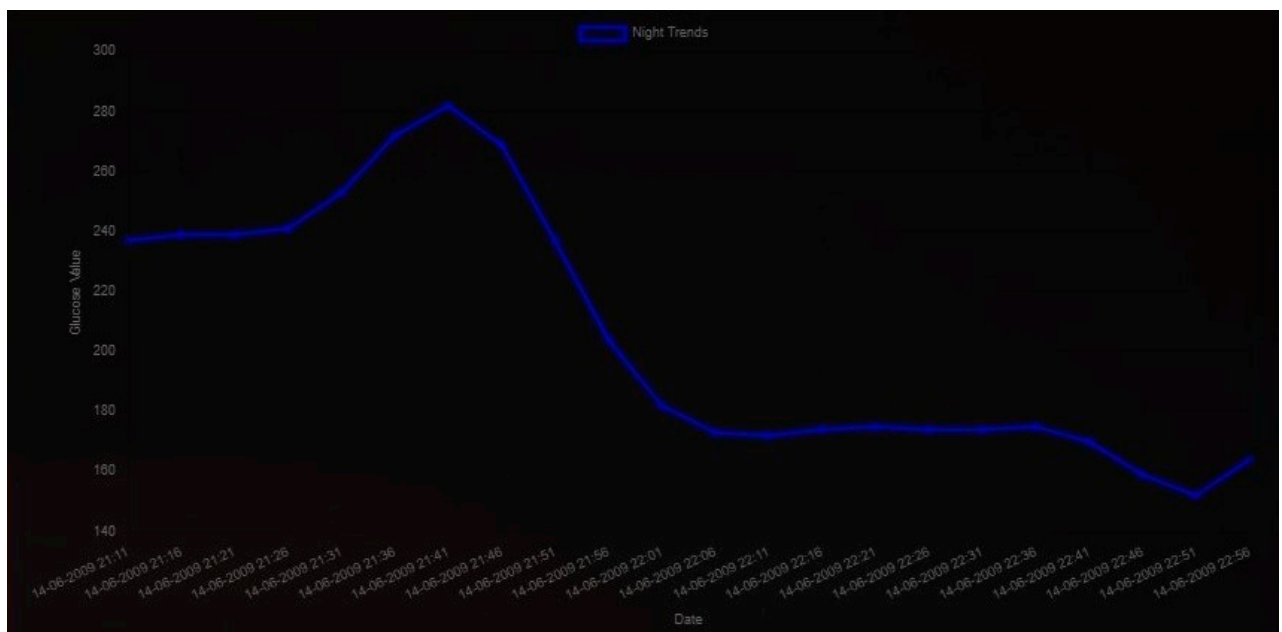

1(E)

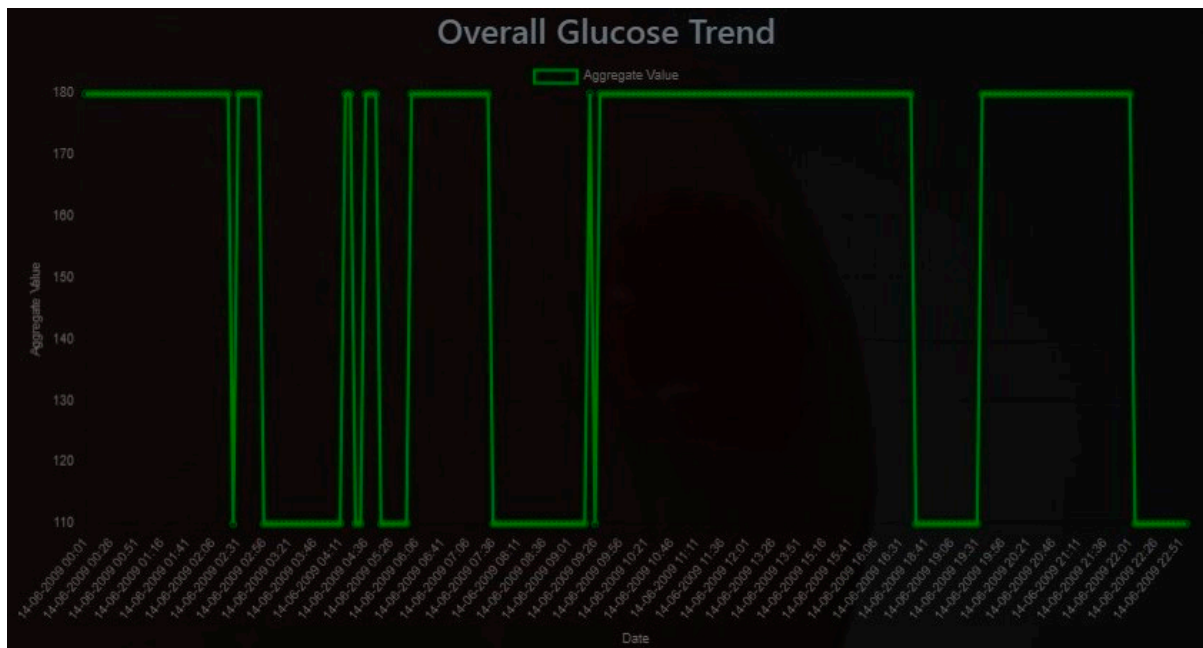

1(F)

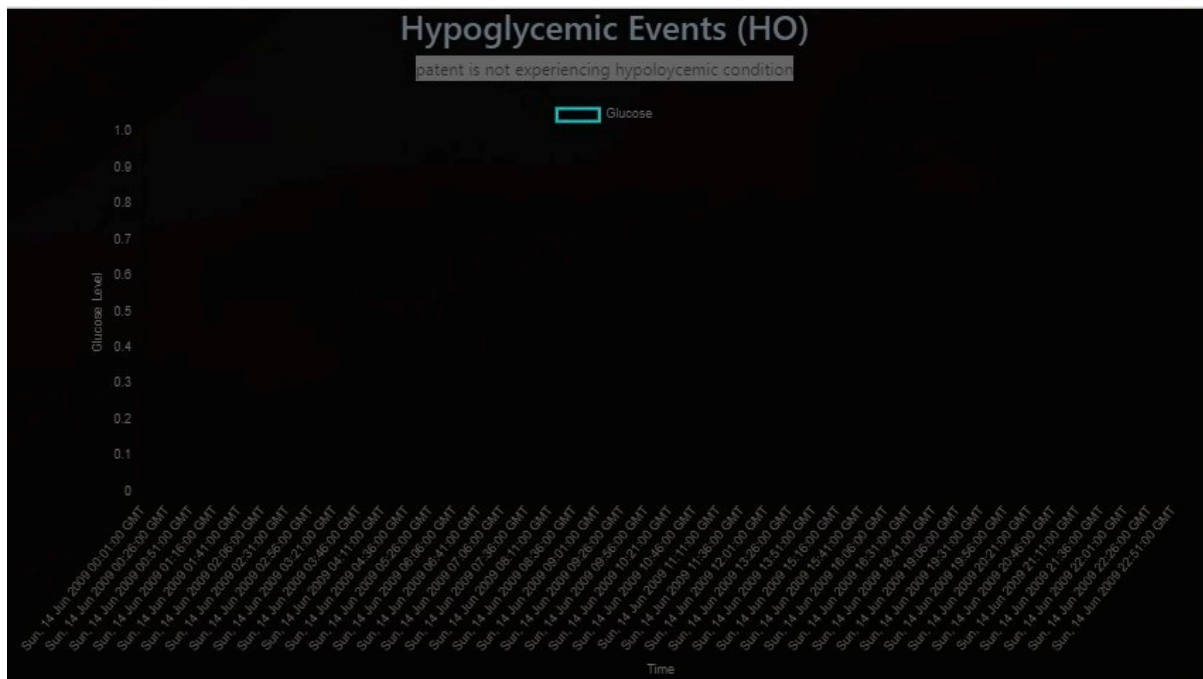

1(G)

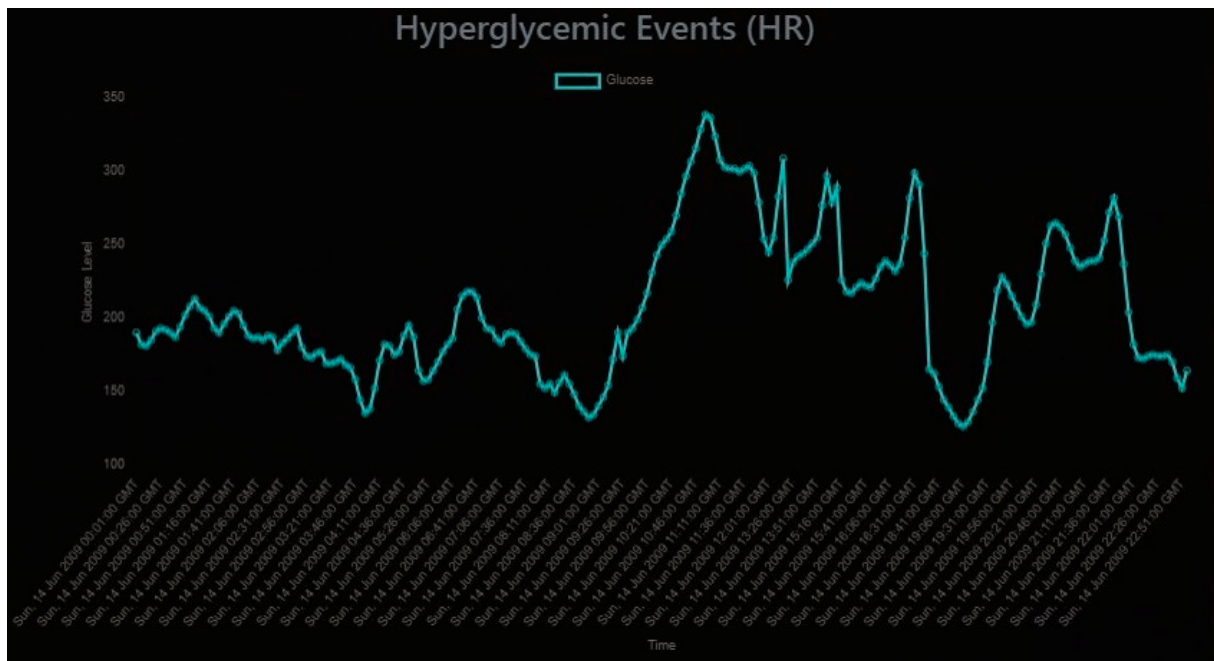

1(H)

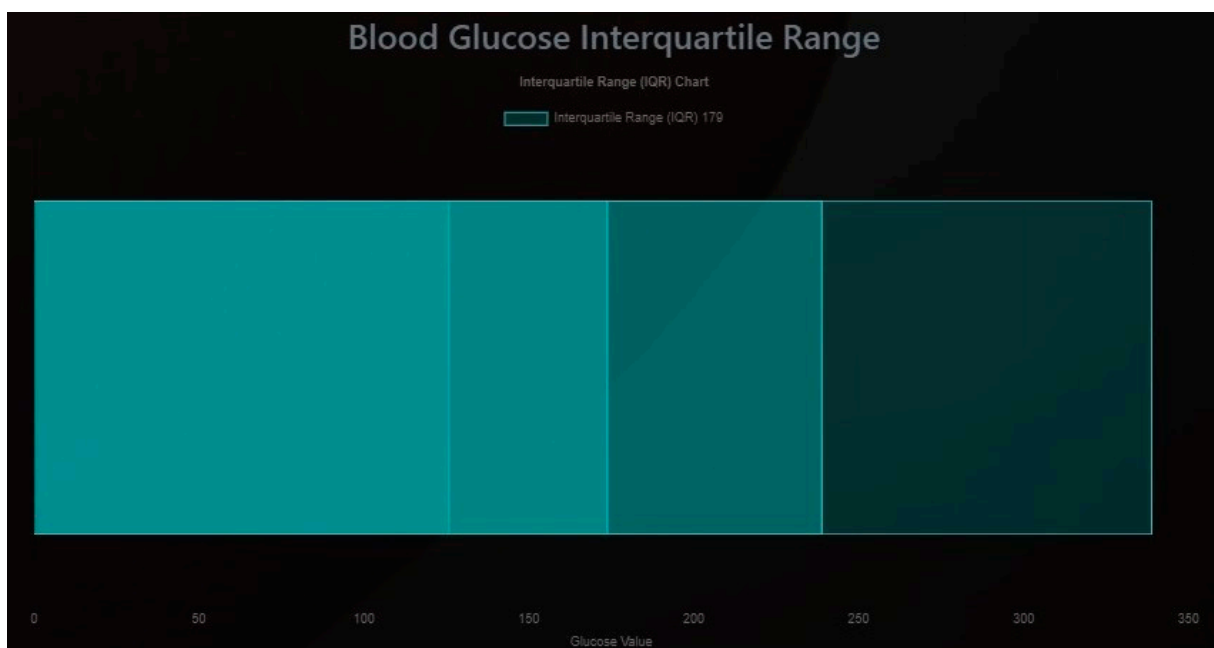

Supplementary Figure S1. Display of clinical metrics and respective graphs. (a) Display page of numerical metrics (b) Intraday Glucose Trends-morning (c) Intraday Glucose Trends- afternoon (d) Intraday Glucose Trends-midnight (e)Overall glucose trends (f) Hypoglycaemic trends (g)Hyperglycaemic trends (h) IQR graph

**Table S1** CGM data analysis from ‘CGM Trace’ - Public dataset from JCHR-JAEB

| P  | Metrics |       |      |           |            |                  |                   |              |               |      |              |       |
|----|---------|-------|------|-----------|------------|------------------|-------------------|--------------|---------------|------|--------------|-------|
|    | SDR     | MG    | SD   | GV<br>(%) | TIR<br>(%) | TAR<br>-I<br>(%) | TAR-<br>II<br>(%) | TBR-I<br>(%) | TBR-II<br>(%) | MODD | CONGA        | MAGE  |
| 1  | 5.4     | 195   | 66.3 | 42.7      | 62.3       | 30.5             | 5.6               | 0            | 2.0           | 5.6  | $4.8e^{-16}$ | 52.2  |
| 2  | 5.3     | 183   | 118  | 64.7      | 52.6       | 12.7             | 26.0              | 5.2          | 2.3           | 5.0  | 0            | 76.4  |
| 3  | 5.1     | 184.6 | 71.5 | 38.7      | 45.0       | 32.8             | 19.7              | 19           | 0             | 6.8  | $8.8e^{-16}$ | 46.1  |
| 4  | 4.0     | 127.7 | 37.9 | 29.7      | 90.4       | 7.7              | 0                 | 1.4          | 0.7           | 5.8  | $8.4e^{-16}$ | 21.6  |
| 5  | 3.2     | 168.9 | 66.8 | 39.4      | 70.7       | 20.0             | 8.3               | 0.7          | 0             | 7.4  | $8.2e^{-16}$ | 49.3  |
| 6  | 3.3     | 142.8 | 54.6 | 38.2      | 68.2       | 25.0             | 4.7               | 3.1          | 0             | 4.78 | 0            | 20.8  |
| 7  | 3.2     | 147.7 | 66.9 | 45.2      | 22.2       | 71.2             | 0                 | 6.5          | 0             | 3.7  | $7.9e^{-16}$ | 36.8  |
| 8  | 4.0     | 130.8 | 46   | 35.1      | 80.2       | 10.0             | 3.9               | 3.6          | 2.6           | 5.6  | $7.8e^{-16}$ | 25    |
| 9  | 5.3     | 135.8 | 53.8 | 39.6      | 70.0       | 19.5             | 1.9               | 5.3          | 2.6           | 7.9  | 0            | 31.5  |
| 10 | 3.7     | 157   | 46.5 | 29.5      | 78.1       | 16.5             | 4.5               | 0            | 0             | 3.75 | 0            | 33.7  |
| 11 | 4.0     | 157.8 | 47.2 | 29.9      | 62.7       | 31.1             | 7.0               | 0            | 0             | 4.5  | $7.8e^{-16}$ | 44.9  |
| 12 | 6.2     | 128.7 | 39.5 | 29.5      | 89.8       | 5.7              | 0                 | 4.5          | 1.4           | 5.4  | $9.8e^{-16}$ | 34    |
| 13 | 3.1     | 116.4 | 38.6 | 33.1      | 92.7       | 4.5              | 2.1               | 0.4          | 0             | 4.5  | $3.8e^{-16}$ | 27.2  |
| 14 | 2.7     | 120.4 | 49.4 | 40.9      | 77.8       | 7.3              | 2.9               | 4.4          | 7.9           | 3.6  | 0            | 24.8  |
| 15 | 2.5     | 170   | 70.6 | 31.5      | 39.4       | 62.2             | 17.5              | 20.1         | 0             | 3.1  | 0            | 93.1  |
| 16 | 5.4     | 121.9 | 43.7 | 35.8      | 68.4       | 18.5             | 0.4               | 10.7         | 1.6           | 3.4  | 0            | 30    |
| 17 | 5.5     | 176.2 | 50   | 28.3      | 58.6       | 33.5             | 7.1               | 1.2          | 0             | 6.3  | 0            | 26.6  |
| 18 | 4.4     | 129.8 | 44   | 38.8      | 80.8       | 13.0             | 0                 | 5.1          | 1.4           | 6.3  | $1.7e^{-16}$ | 13.6  |
| 19 | 3.6     | 147.1 | 53.9 | 36.6      | 77.8       | 12.3             | 9.4               | 0.9          | 0             | 5.9  | $5.8e^{-16}$ | 29.8  |
| 20 | 7       | 187.1 | 66.3 | 36.6      | 52.7       | 31.7             | 16.9              | 0            | 0             | 5.1  | $4.8e^{-16}$ | 29.8  |
| 21 | 2.7     | 158.4 | 39.9 | 25.1      | 74.7       | 25.0             | 0                 | 0            | 0             | 5.1  | $7.8e^{-16}$ | 37.54 |
| 22 | 3.3     | 194.7 | 65.9 | 38.8      | 63.7       | 43.7             | 20.3              | 1.7          | 0.7           | 4.4  | $6.5e^{-16}$ | 48.6  |
| 23 | 7.3     | 163.6 | 74.8 | 45.6      | 55.4       | 24.7             | 12.0              | 5.6          | 1.7           | 8.5  | 0            | 52.4  |
| 24 | 3.1     | 203.9 | 50.7 | 24.7      | 35.9       | 53.9             | 26.1              | 0            | 2             | 3.9  | 0            | 41.7  |
| 25 | 3.7     | 227.5 | 86.1 | 34.8      | 30.1       | 25.4             | 42.6              | 1.3          | 1.1           | 5.5  | $7.9e^{-16}$ | 44.8  |
| 26 | 2.5     | 155.2 | 45.3 | 29.1      | 33.7       | 50.5             | 10.9              | 3.8          | 0.2           | 5.8  | $8.8e^{-16}$ | 51.3  |
| 27 | 2.5     | 210   | 51.8 | 24.6      | 27         | 51.2             | 20.8              | 0            | 0             | 3.2  | 0            | 60.7  |
| 28 | 5.9     | 176.2 | 48.4 | 27.4      | 54.6       | 35.4             | 8.8               | 0.9          | 0             | 7.6  | 0            | 11.8  |
| 29 | 6.2     | 151.6 | 65.3 | 33        | 49.3       | 26.0             | 24.3              | 0.2          | 0             | 4.1  | $8.6e^{-16}$ | 41.2  |
| 30 | 3.1     | 230.8 | 43.9 | 19.0      | 17.6       | 44.9             | 36.8              | 0            | 0             | 7.6  | $9.8e^{-16}$ | 54    |
| 31 | 6.3     | 167.2 | 50.0 | 29.8      | 66.1       | 25.8             | 8.0               | 0            | 0             | 8.5  | $7.7e^{-16}$ | 171.4 |
| 32 | 2.9     | 135   | 45.8 | 33.9      | 66.1       | 24               | 2.2               | 5.9          | 1.8           | 3.5  | $6.6e^{-16}$ | 40.22 |
| 33 | 1.9     | 159.3 | 42.9 | 26.9      | 78.1       | 15.9             | 5.8               | 0            | 0             | 2.9  | $4.4e^{-16}$ | 64    |
| 34 | 2.3     | 110.9 | 42.9 | 36        | 81.0       | 7.4              | 1.2               | 10           | 0.76          | 3.31 | $9.7e^{-16}$ | 33.9  |
| 35 | 5.4     | 138.9 | 56.2 | 30.4      | 76.1       | 12.6             | 4.7               | 6.4          | 0.9           | 5.2  | $6.5e^{-16}$ | 23    |
| 36 | 3       | 133.8 | 44.6 | 33.2      | 84.0       | 11.7             | 2.1               | 1.4          | 0             | 4.4  | 0            | 36    |
| 37 | 4.02    | 189.3 | 59.1 | 37.2      | 51.1       | 30.3             | 18.8              | 0            | 0             | 2.7  | $8.2e^{-16}$ | 34.6  |

**Abbreviations:** M, metrics; P, patient; SDR, standard deviation rate of change; SD, Standard deviation; MG, mean glucose; GV, glucose variability; TIR, time in range; TAR, time above range; TBR, time below range; MODD, mean of daily differences; CONGA, continuous overall net glycemic action; MAGE, mean amplitude of glycemic excursions
